# Supplementary material
Source: PubMed Central journal article supplement (PMC7644189)
Supplement: mmc2.pdf [file mmc2.pdf]

This document certifies that the manuscript

**Psychological impact of the COVID-19 outbreak on students of a French region severely affected by the disease: results of PIMS-CoV 19 study**

prepared by the authors

**Stéphanie Bourion-Bédès , Cyril Tarquinio, Martine Batt, Pascale Tarquinio, Romain Lebreuilly, Christine Sorsana, Karine Legrand,...**

was edited for proper English language, grammar, punctuation, spelling, and overall style by one or more of the highly qualified native English speaking editors at AJE.

This certificate was issued on **October 29, 2020** and may be verified on the [AJE website](#) using the verification code **5EFF-7B6F-5495-761C-CF7P**.

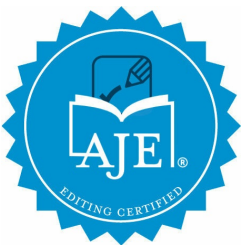

Neither the research content nor the authors' intentions were altered in any way during the editing process. Documents receiving this certification should be English-ready for publication; however, the author has the ability to accept or reject our suggestions and changes. To verify the final AJE edited version, please visit our verification page at [aje.com/certificate](#). If you have any questions or concerns about this edited document, please contact AJE at [support@aje.com](mailto:support@aje.com).
